# Supplementary material for: Facile synthesis of Ag nanowire–rGO composites and their promising field emission performance
Source: Royal Society of Chemistry journal article supplement (doi:10.1039/c5ra00308c), 2015-01-01
Supplement: c5ra00308c1.pdf [file c5ra00308c1.pdf]

## **Supporting Information:**

### **Facile synthesis of Ag nanowires-rGO composites and their promising field emission performance**

Aneeya K Samantara<sup>1</sup> Dillip Kumar Mishra,<sup>1</sup> Sachin R. Suryawanshi,<sup>2</sup> Mahendra A. More,<sup>2\*</sup> Ranjit Thapa,<sup>3</sup> Dattatray J. Late,<sup>4,\*</sup> Bikash Kumar Jena,<sup>1,\*</sup> Chandra Sekhar Rout<sup>5\*</sup>

<sup>1</sup>*CSIR-Institute of Minerals and Materials Technology, Bhubaneswar 751013, Odisha, India*

<sup>2</sup>*Department of Physics, University of Pune, Pune-411007, Maharashtra, India*

<sup>3</sup>*SRM Research Institute, SRM University, Kattankulathur, Chennai 603 203, Tamil Nadu, India*

<sup>4</sup>*Physical & Materials Chemistry Division, CSIR-National Chemical Laboratory, Dr. Homi Bhabha Road, Pune 411008, Maharashtra, India*

<sup>5</sup>*School of Basic Sciences, Indian Institute of Technology, Bhubaneswar 751013, Odisha, India*

#### **\*Corresponding authors:**

[datta099@gmail.com](mailto:datta099@gmail.com)/[dj.late@ncl.res.in](mailto:dj.late@ncl.res.in) (D.J. Late), [csrout@iitbbs.ac.in](mailto:csrout@iitbbs.ac.in) (C.S. Rout)  
[mam@physics.unipune.ac.in](mailto:mam@physics.unipune.ac.in)(MAM), [bikash@immt.res.in](mailto:bikash@immt.res.in) (B. K. Jena),

**Figure S1:**

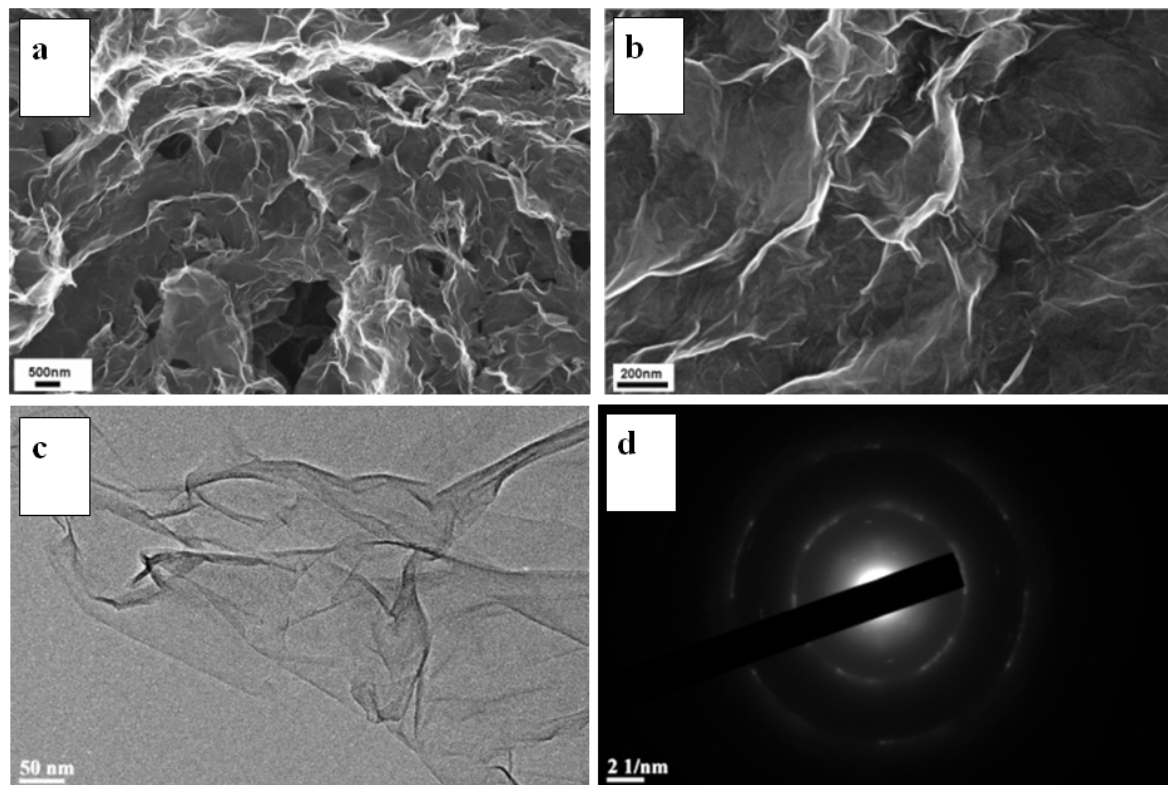

**Figure S1:** FESEM (a, b), TEM (c) images of GO and the corresponding SAED pattern.

**Figure S2:**

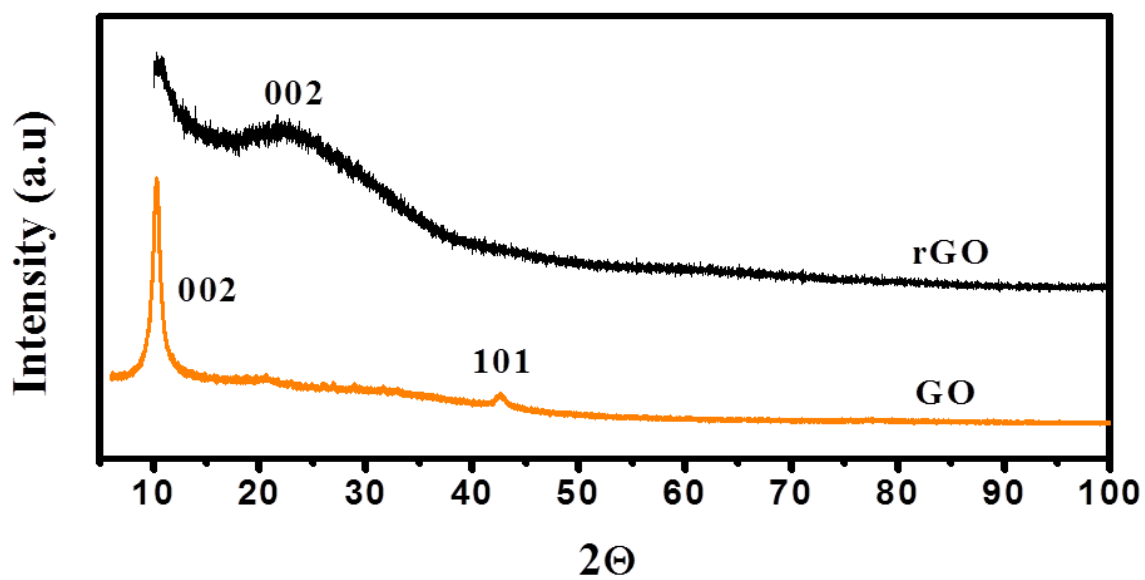

**Figure S2:** XRD pattern for GO and rGO.
